# Supplementary material
Source: PubMed Central journal article supplement (PMC6990975)
Supplement: NIHMS1067683-supplement-Supplemental.pdf [file NIHMS1067683-supplement-Supplemental.pdf]

Trial locations in Democratic Republic of Congo:

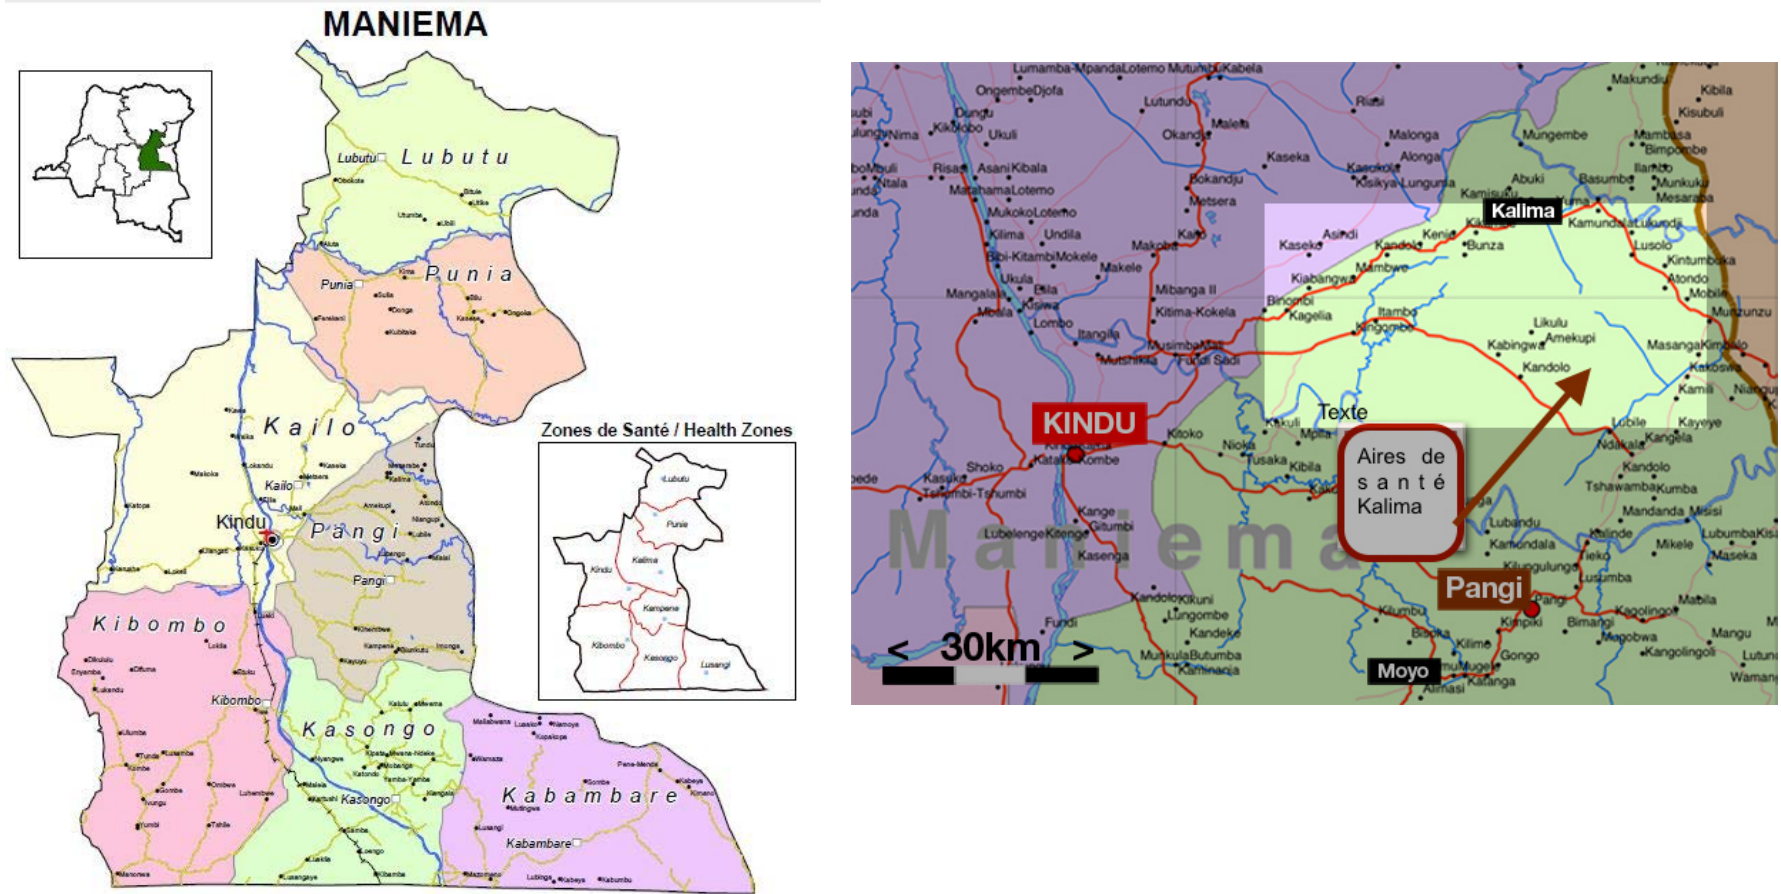

Figure S1: Map of the Maniema province (left) in DR Congo (upper left inset) with the Maniema region (middle inset) shown expanded on the right.

**Table S1:** Distribution among patients of adverse effects.

| <b>Observed adverse effects</b>                               | Number of subjects in the <i>Artemisia</i> arm | Frequency N/392 % | Number of subjects in the PZQ arm | Frequency N/390 =% |
|---------------------------------------------------------------|------------------------------------------------|-------------------|-----------------------------------|--------------------|
| Abdominal discomfort                                          | 10                                             | 2.6               | 165                               | 42.3               |
| Abdominal pain                                                | 5                                              | 1.3               | 175                               | 44.9               |
| Anorexia                                                      | 25                                             | 6.4               | 105                               | 26.9               |
| Arrhythmia                                                    | 0                                              | 0                 | 10                                | 2.6                |
| Asthenia                                                      | 2                                              | 0.5               | 269                               | 69.0               |
| Cutaneous rash                                                | 0                                              | 0                 | 22                                | 5.6                |
| Diarrhea                                                      | 0                                              | 0                 | 30                                | 7.7                |
| Dizziness                                                     | 5                                              | 1.3               | 80                                | 20.5               |
| Drowsiness                                                    | 0                                              | 0                 | 20                                | 5.1                |
| Headaches                                                     | 0                                              | 0                 | 130                               | 33.3               |
| Itching                                                       | 0                                              | 0                 | 120                               | 30.8               |
| Myalgia                                                       | 0                                              | 0                 | 35                                | 9.0                |
| Nausea                                                        | 25                                             | 6.4               | 200                               | 51.3               |
| Vomiting                                                      | 7                                              | 1.8               | 15                                | 3.8                |
| 400 <i>Artemisia</i> and 400 PZQ patients at trial inclusion. |                                                |                   |                                   |                    |
